# Supplementary material for: Novel optical temperature sensor based on emission in Pr3+ doped ferroelectric Ba0.7Sr0.3TiO3
Source: Royal Society of Chemistry journal article supplement (doi:10.1039/c8ra04228d), 2018-01-01
Supplement: c8ra04228d1.pdf [file c8ra04228d1.pdf]

## Supplementary Information

### **Novel optical temperature sensor based on emission in Pr<sup>3+</sup> doped ferroelectric Ba<sub>0.7</sub>Sr<sub>0.3</sub>TiO<sub>3</sub>**

Tang Wei,\* Ni Haiyong, Zhang Qihong and Ding Jianhong

Guangdong Research Institute of Rare-Metal, Guangdong Academy of Science,  
Guangzhou 510650, China, Email: [t4852065w@126.com](mailto:t4852065w@126.com).

\* Correspondence should be addressed to [t4852065w@126.com](mailto:t4852065w@126.com)

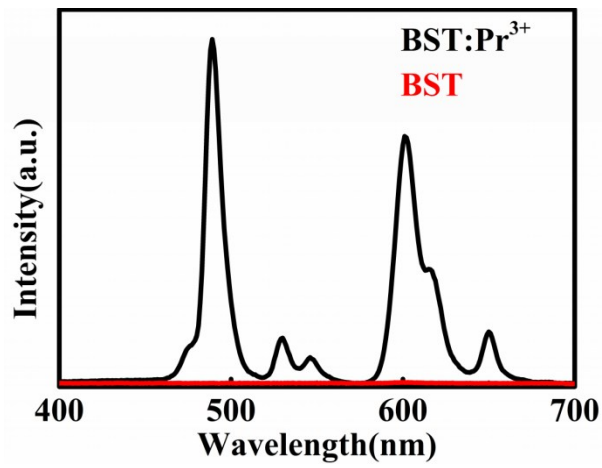

Supplementary Fig.S1 PL of BST and BST:Pr<sup>3+</sup>

Fig. S1 shows the intrinsic BST almost have no PL properties relative to BST:Pr<sup>3+</sup>. It can be inferred that the PL of BST:Pr<sup>3+</sup> is derived from Pr<sup>3+</sup>.
